# Supplementary material for: Biological impact of iberdomide in patients with active systemic lupus erythematosus
Source: PubMed Central journal article supplement (PMC9279852; doi:10.1136/annrheumdis-2022-222212), 2022-04-27

## **BIOLOGICAL IMPACT OF IBERDOMIDE IN PATIENTS WITH ACTIVE SYSTEMIC LUPUS ERYTHEMATOSUS**

Peter E. Lipsky,<sup>1</sup> Ronald van Vollenhoven,<sup>2</sup> Thomas Dörner,<sup>3</sup> Victoria P. Werth,<sup>4</sup> Joan T. Merrill,<sup>5</sup> Richard Furie,<sup>6</sup> Milan Petronijevic,<sup>7</sup> Benito Velasco Zamora,<sup>8</sup> Maria Majdan,<sup>9</sup> Fedra Irazoque-Palazuelos,<sup>10</sup> Robert Terbrueggen,<sup>11</sup> Nikolay Delev,<sup>12</sup> Michael Weiswasser,<sup>12</sup> Shimon Korish,<sup>12</sup> Mark Stern,<sup>12</sup> Sarah Hersey,<sup>12</sup> Ying Ye,<sup>12</sup> Allison Gaudy,<sup>12</sup> Zhaohui Liu,<sup>12</sup> Robert Gagnon,<sup>12</sup> Shaojun Tang,<sup>12\*</sup> Peter H. Schafer<sup>12</sup>

<sup>1</sup> RILITE Foundation and AMPEL BioSolutions, Charlottesville, VA, USA; <sup>2</sup>Amsterdam University Medical Centers, Amsterdam, The Netherlands; <sup>3</sup>German Rheumatism Research Center and Charité University Hospitals, Berlin, Germany; <sup>4</sup>University of Pennsylvania and the Michael J. Crescenz VA Medical Center, Philadelphia, PA, USA; <sup>5</sup>Oklahoma Medical Research Foundation, Oklahoma City, OK, USA; <sup>6</sup>Northwell Health, Great Neck, NY, USA; <sup>7</sup>Military Medical Academy, Belgrade, Serbia; <sup>8</sup>Instituto CER S.A., Buenos Aires, Argentina; <sup>9</sup>Samodzielny Publiczny Szpital Kliniczny Nr 4 w Lublinie, Medical University of Lublin, Lublin, Poland; <sup>10</sup>Centro de Investigación y Tratamiento Reumatológico S.C, Miguel Hidalgo, Mexico; <sup>11</sup>DxTerity Diagnostics Inc, Rancho Dominguez, CA, USA; <sup>12</sup>Bristol Myers Squibb, Princeton, NJ, USA

\*At the time of the study.

## Supplementary Methods

### Cut point determination

In this training dataset, the type I IFN module and the Ikaros type I IFN module (genes acting with *IKZF1* as expression quantitative trait loci [eQTL]) had bimodal distributions, and the cut points were set at the antimode (i.e., the lowest point in the distribution curve between the two modes): type I IFN module  $-1.38$  and Ikaros type I IFN module  $-0.76$ . The distributions of *IKZF1*, *IKZF3*, the B cell module and T cell exhaustion module were unimodal, and the cut points were set at the median (*IKZF1*,  $-0.58$ ; *IKZF3*,  $-0.49$ ; B cell module,  $-0.3$ ; T cell exhaustion module,  $-0.51$ ).

### Exploratory analyses

The bootstrapping and aggregating of thresholds from trees (BATTing) procedure is designed to provide a robust cut point estimate for the single marker being evaluated (e.g., type I IFN). The original data (placebo + 0.45 mg dose groups, with total  $N$  from these groups noted as  $N_{\text{total}}$ ) is bootstrap sampled (randomly sampled with size  $N_{\text{total}}$ , with replacement), and the optimal cut point ( $C$ ) forms the “tree” by partitioning the data into groups above and below  $C$ .  $C$  is equivalent to the minimum  $P$  value for interaction of placebo and iberdomide 0.45 mg SRI-4 response rates in a logistic regression setting, for groups above and below  $C$  in the bootstrapped sample. The bootstrapping step is repeated  $B$  times ( $B=1000$ ), and the  $B$  values of  $C$  are aggregated, with the median of these values determining the optimal cut point. Due to bootstrapping, the threshold is robust to small perturbations, or outliers, in the data and not prone to overfitting. The other dose groups (0.15 and 0.30 mg) are then tested using the optimal

cut point, for validation of the result. This analysis identified a higher type I IFN cutoff point of 0.615, hereafter referred to as IFN super-high.

#### Pharmacokinetics

Sparse pharmacokinetic data were pooled with pharmacokinetic data collected previously from healthy subjects and patients with SLE and analysed using population methods to determine individual pharmacokinetic exposure parameters and explore the effect of covariates on exposure.

**Supplementary Table 1.** Baseline mRNA and DNA expression by treatment group (ITT population)

|                              | Iberdomide        |                      |                     |                      |
|------------------------------|-------------------|----------------------|---------------------|----------------------|
|                              | Placebo<br>(n=83) | 0.15 mg QD<br>(n=42) | 0.3 mg QD<br>(n=82) | 0.45 mg QD<br>(n=81) |
| Ikaros ( <i>IKZF1</i> ) high | 56 (68)           | 28 (67)              | 53 (65)             | 64 (79)              |
| Aiolos ( <i>IKZF3</i> ) high | 27 (33)           | 14 (33)              | 32 (39)             | 36 (44)              |
| Type I IFN module high       | 48 (58)           | 25 (60)              | 49 (60)             | 57 (70)              |
| Ikaros IFN module high       | 49 (59)           | 30 (71)              | 49 (60)             | 62 (77)              |
| T cell exhaustion module low | 60 (72)           | 29 (69)              | 65 (79)             | 66 (82)              |
| B cell module high           | 46 (55)           | 24 (57)              | 48 (59)             | 54 (67)              |

The cutoffs were set a priori based on an independent training data set. The type I IFN module and the Ikaros type I IFN (eQTL) module had bimodal distributions and the cutoffs were set at the antimode: type I IFN module [*IFI27*, *IFI44*, *IFI44L*, *RSAD2*]=, -1.38, and Ikaros type I IFN module [*HERC5*, *IFI6*, *IFIT1*, *MX1*, *TNFRSF21*]=-0.76. The distributions of Ikaros, Aiolos and B cell modules were unimodal, and the cutoffs were set at the median: Ikaros [*IKZF1*]=-0.58; Aiolos [*IKZF3*]=-0.49; B cell module [*CD19*, *BACH2*, *CD22*]=-0.3; and T cell exhaustion [*CTLA4*, *IL7R*, *LAG3*, *PDCD1*, *ABCE1*]=-0.51.

IFN, interferon; ITT, intent-to-treat; QD, once daily.

**Supplementary Table 2.** Numeric data for Figure 1: Time course of change from baseline during iberdomide treatment in selected blood cells

| <b>Adjusted mean (SE)</b>                   | <b>Week 0</b> | <b>Week 4</b>        | <b>Week 12</b>       | <b>Week 24</b>       |
|---------------------------------------------|---------------|----------------------|----------------------|----------------------|
| <b>CD19 B cells (10<sup>9</sup>/L)</b>      |               |                      |                      |                      |
| Placebo                                     | 180.103       | 163.211<br>(8.715)   | 166.824<br>(7.430)   | 166.903<br>(10.817)  |
| Iberdomide 0.15 mg QD                       | 188.639       | 136.145<br>(10.893)  | 134.922<br>(10.042)  | 119.444<br>(11.039)  |
| Iberdomide 0.3 mg QD                        | 197.616       | 113.232<br>(8.174)   | 102.133<br>(7.581)   | 96.007<br>(8.574)    |
| Iberdomide 0.45 mg QD                       | 211.972       | 90.019<br>(8.488)    | 71.137<br>(7.697)    | 60.083<br>(9.124)    |
| <b>CD20 B cells (10<sup>9</sup>/L)</b>      |               |                      |                      |                      |
| Placebo                                     | 30.492        | 21.640<br>(1.826)    | 21.060<br>(1.488)    | 18.210<br>(1.926)    |
| Iberdomide 0.15 mg QD                       | 31.674        | 16.127<br>(2.101)    | 15.098<br>(1.759)    | 12.212<br>(1.819)    |
| Iberdomide 0.3 mg QD                        | 38.912        | 11.782<br>(1.553)    | 9.653<br>(1.267)     | 8.940<br>(1.381)     |
| Iberdomide 0.45 mg QD                       | 39.914        | 7.217<br>(1.496)     | 5.056<br>(1.303)     | 4.038<br>(1.430)     |
| <b>Total CD3 T cells (10<sup>9</sup>/L)</b> |               |                      |                      |                      |
| Placebo                                     | 1086.059      | 1145.725<br>(38.715) | 1134.861<br>(44.756) | 1133.939<br>(51.177) |
| Iberdomide 0.15 mg QD                       | 1237.639      | 1128.985<br>(54.688) | 1324.183<br>(66.503) | 1256.970<br>(63.590) |
| Iberdomide 0.3 mg QD                        | 1151.014      | 1134.530<br>(38.814) | 1291.049<br>(47.814) | 1236.539<br>(49.437) |
| Iberdomide 0.45 mg QD                       | 1250.183      | 1031.406<br>(40.670) | 1148.483<br>(47.101) | 1112.613<br>(47.559) |

|                                    |         |                     |                     |                     |
|------------------------------------|---------|---------------------|---------------------|---------------------|
| CD4 helper T cells ( $10^9/L$ )    |         |                     |                     |                     |
| Placebo                            | 681.588 | 701.100<br>(23.746) | 691.668<br>(26.724) | 692.040<br>(31.989) |
| Iberdomide 0.15 mg QD              | 719.222 | 637.010<br>(33.878) | 747.584<br>(39.111) | 712.739<br>(38.355) |
| Iberdomide 0.3 mg QD               | 695.904 | 656.170<br>(23.997) | 732.973<br>(28.278) | 715.382<br>(29.039) |
| Iberdomide 0.45 mg QD              | 787.465 | 598.295<br>(24.476) | 630.336<br>(28.022) | 618.636<br>(28.474) |
| CD8 cytotoxic T cells ( $10^9/L$ ) |         |                     |                     |                     |
| Placebo                            | 380.912 | 422.735<br>(17.031) | 424.266<br>(20.412) | 413.080<br>(22.862) |
| Iberdomide 0.15 mg QD              | 498.028 | 445.980<br>(24.328) | 524.817<br>(30.733) | 498.460<br>(29.554) |
| Iberdomide 0.3 mg QD               | 435.137 | 439.529<br>(17.341) | 527.051<br>(22.918) | 484.170<br>(23.982) |
| Iberdomide 0.45 mg QD              | 445.352 | 405.957<br>(17.421) | 472.78<br>(22.190)  | 463.766<br>(24.543) |
| NK cells ( $10^9/L$ )              |         |                     |                     |                     |
| Placebo                            | 154.912 | 152.525<br>(7.752)  | 154.705<br>(8.849)  | 150.036<br>(9.796)  |
| Iberdomide 0.15 mg QD              | 175.722 | 144.369<br>(10.529) | 163.395<br>(12.442) | 162.187<br>(13.197) |
| Iberdomide 0.3 mg QD               | 163.096 | 154.067<br>(7.696)  | 171.117<br>(9.682)  | 161.796<br>(10.747) |
| Iberdomide 0.45 mg QD              | 148.169 | 138.913<br>(7.571)  | 145.904<br>(8.928)  | 147.980<br>(9.531)  |

|                                    |         |                     |                    |                     |
|------------------------------------|---------|---------------------|--------------------|---------------------|
| CD268 B cells (10 <sup>9</sup> /L) |         |                     |                    |                     |
| Placebo                            | 178.196 | 161.419<br>(9.091)  | 163.784<br>(7.711) | 163.015<br>(10.194) |
| Iberdomide 0.15 mg QD              | 181.091 | 133.339<br>(11.168) | 132.239<br>(9.999) | 117.577<br>(10.836) |
| Iberdomide 0.3 mg QD               | 191.328 | 112.763<br>(8.266)  | 103.979<br>(7.698) | 96.794<br>(8.432)   |
| Iberdomide 0.45 mg QD              | 212.301 | 86.103<br>(8.919)   | 67.928<br>(7.891)  | 57.405<br>(9.135)   |
| Plasma blasts (10 <sup>9</sup> /L) |         |                     |                    |                     |
| Placebo                            | 0.645   | 0.681<br>(0.075)    | 0.827<br>(0.154)   | 0.629<br>(0.123)    |
| Iberdomide 0.15 mg QD              | 0.601   | 0.682<br>(0.093)    | 0.853<br>(0.179)   | 0.636<br>(0.116)    |
| Iberdomide 0.3 mg QD               | 0.722   | 0.640<br>(0.069)    | 0.926<br>(0.143)   | 0.758<br>(0.127)    |
| Iberdomide 0.45 mg QD              | 0.664   | 0.595<br>(0.073)    | 1.043<br>(0.163)   | 0.707<br>(0.097)    |
| Plasmacytoid DC (cells/ $\mu$ L)   |         |                     |                    |                     |
| Placebo                            | 2.975   | 2.525<br>(0.165)    | 2.567<br>(0.162)   | 2.719<br>(0.206)    |
| Iberdomide 0.15 mg QD              | 3.614   | 1.045<br>(0.214)    | 1.315<br>(0.206)   | 1.555<br>(0.229)    |
| Iberdomide 0.3 mg QD               | 3.007   | 1.116<br>(0.175)    | 1.030<br>(0.157)   | 1.012<br>(0.173)    |
| Iberdomide 0.45 mg QD              | 3.000   | 1.323<br>(0.189)    | 1.011<br>(0.165)   | 0.866<br>(0.169)    |

|                                                   |        |                   |                   |                   |
|---------------------------------------------------|--------|-------------------|-------------------|-------------------|
| <b>Switched memory B cells (10<sup>9</sup>/L)</b> |        |                   |                   |                   |
| Placebo                                           | 31.319 | 25.191<br>(1.486) | 25.173<br>(1.375) | 22.080<br>(2.001) |
| Iberdomide 0.15 mg QD                             | 29.476 | 19.110<br>(1.973) | 19.427<br>(1.995) | 18.126<br>(1.805) |
| Iberdomide 0.3 mg QD                              | 31.954 | 16.833<br>(1.451) | 17.131<br>(1.361) | 16.150<br>(1.411) |
| Iberdomide 0.45 mg QD                             | 38.573 | 14.698<br>(1.455) | 12.902<br>(1.412) | 10.474<br>(1.396) |
| <b>Plasma cells (10<sup>9</sup>/L)</b>            |        |                   |                   |                   |
| Placebo                                           | 7.606  | 7.243<br>(1.075)  | 4.603<br>(0.919)  | 6.744<br>(1.013)  |
| Iberdomide 0.15 mg QD                             | 5.801  | 8.282<br>(1.397)  | 6.650<br>(1.300)  | 7.022<br>(1.135)  |
| Iberdomide 0.3 mg QD                              | 5.057  | 10.824<br>(0.994) | 11.939<br>(1.173) | 8.941<br>(1.064)  |
| Iberdomide 0.45 mg QD                             | 4.789  | 11.394<br>(1.014) | 9.309<br>(0.979)  | 8.413<br>(0.957)  |
| <b>Myeloid DC1 (cells/<math>\mu</math>L)</b>      |        |                   |                   |                   |
| Placebo                                           | 7.615  | 6.025<br>(0.365)  | 6.360<br>(0.437)  | 6.736<br>(0.523)  |
| Iberdomide 0.15 mg QD                             | 9.650  | 4.330<br>(0.502)  | 5.630<br>(0.589)  | 5.020<br>(0.701)  |
| Iberdomide 0.3 mg QD                              | 7.071  | 4.818<br>(0.342)  | 5.605<br>(0.451)  | 5.721<br>(0.527)  |
| Iberdomide 0.45 mg QD                             | 8.549  | 3.837<br>(0.346)  | 3.830<br>(0.392)  | 4.532<br>(0.460)  |



|                               |       |                  |                  |                  |
|-------------------------------|-------|------------------|------------------|------------------|
| Regulatory T cells (%)        |       |                  |                  |                  |
| Placebo                       | 2.125 | 2.035<br>(0.099) | 2.011<br>(0.113) | 1.996<br>(0.125) |
| Iberdomide 0.15 mg QD         | 1.845 | 2.484<br>(0.138) | 2.672<br>(0.159) | 2.762<br>(0.168) |
| Iberdomide 0.3 mg QD          | 2.240 | 3.039<br>(0.110) | 3.231<br>(0.132) | 3.255<br>(0.153) |
| Iberdomide 0.45 mg QD         | 2.173 | 3.293<br>(0.102) | 3.674<br>(0.117) | 3.900<br>(0.132) |
| T follicular helper cells (%) |       |                  |                  |                  |
| Placebo                       | 3.818 | 3.760<br>(0.162) | 3.788<br>(0.184) | 4.150<br>(0.229) |
| Iberdomide 0.15 mg QD         | 4.049 | 4.145<br>(0.232) | 4.284<br>(0.254) | 4.863<br>(0.304) |
| Iberdomide 0.3 mg QD          | 4.276 | 4.368<br>(0.164) | 4.911<br>(0.197) | 5.200<br>(0.234) |
| Iberdomide 0.45 mg QD         | 3.896 | 4.305<br>(0.161) | 4.683<br>(0.187) | 5.189<br>(0.227) |
| T helper 17 cells (%)         |       |                  |                  |                  |
| Placebo                       | 2.764 | 2.613<br>(0.108) | 2.865<br>(0.116) | 2.837<br>(0.137) |
| Iberdomide 0.15 mg QD         | 2.615 | 2.623<br>(0.157) | 2.878<br>(0.164) | 2.965<br>(0.181) |
| Iberdomide 0.3 mg QD          | 3.141 | 2.781<br>(0.111) | 2.938<br>(0.126) | 2.874<br>(0.143) |
| Iberdomide 0.45 mg QD         | 2.725 | 2.596<br>(0.107) | 2.819<br>(0.118) | 2.962<br>(0.132) |

BLyS, B lymphocyte stimulator; DC, dendritic cell; NK, natural killer; SE, standard error.

**Supplementary Table 3.** Numeric data for Figure 2: Change from baseline in plasma cytokines during iberdomide treatment by ultra-sensitive cytokine assays

| <b>Adjusted mean (SE)</b> | <b>Week 0</b> | <b>Week 4</b>    | <b>Week 12</b>   | <b>Week 24</b>   |
|---------------------------|---------------|------------------|------------------|------------------|
| <b>IL-2 (pg/mL)</b>       |               |                  |                  |                  |
| Placebo                   | 0.277         | 0.322<br>(0.033) | 0.289<br>(0.031) | 0.333<br>(0.036) |
| Iberdomide 0.15 mg QD     | 0.229         | 0.535<br>(0.045) | 0.434<br>(0.043) | 0.446<br>(0.048) |
| Iberdomide 0.3 mg QD      | 0.311         | 0.591<br>(0.036) | 0.468<br>(0.036) | 0.489<br>(0.041) |
| Iberdomide 0.45 mg QD     | 0.282         | 0.694<br>(0.033) | 0.676<br>(0.033) | 0.622<br>(0.035) |
| <b>IL-10 (pg/mL)</b>      |               |                  |                  |                  |
| Placebo                   | 2.276         | 2.151<br>(0.139) | 1.871<br>(0.150) | 1.851<br>(0.140) |
| Iberdomide 0.15 mg QD     | 2.586         | 2.483<br>(0.188) | 1.828<br>(0.212) | 1.630<br>(0.183) |
| Iberdomide 0.3 mg QD      | 2.593         | 2.726<br>(0.146) | 2.487<br>(0.165) | 2.031<br>(0.147) |
| Iberdomide 0.45 mg QD     | 2.092         | 2.889<br>(0.137) | 2.597<br>(0.146) | 2.200<br>(0.143) |
| <b>IL-17A (pg/mL)</b>     |               |                  |                  |                  |
| Placebo                   | 0.490         | 0.463<br>(0.034) | 0.392<br>(0.046) | 0.445<br>(0.061) |
| Iberdomide 0.15 mg QD     | 0.683         | 0.479<br>(0.044) | 0.434<br>(0.062) | 0.408<br>(0.085) |
| Iberdomide 0.3 mg QD      | 0.511         | 0.492<br>(0.035) | 0.606<br>(0.054) | 0.638<br>(0.063) |
| Iberdomide 0.45 mg QD     | 0.346         | 0.466<br>(0.032) | 0.475<br>(0.046) | 0.490<br>(0.057) |

|                       |         |                     |                     |                     |
|-----------------------|---------|---------------------|---------------------|---------------------|
| IL-17F (pg/mL)        |         |                     |                     |                     |
| Placebo               | 1.921   | 2.214<br>(0.110)    | 1.684<br>(0.146)    | 1.715<br>(0.150)    |
| Iberdomide 0.15 mg QD | 1.800   | 2.347<br>(0.160)    | 1.600<br>(0.193)    | 1.513<br>(0.178)    |
| Iberdomide 0.3 mg QD  | 1.680   | 2.162<br>(0.112)    | 1.915<br>(0.166)    | 1.773<br>(0.158)    |
| Iberdomide 0.45 mg QD | 2.650   | 2.065<br>(0.112)    | 1.917<br>(0.141)    | 1.736<br>(0.154)    |
| IL-21 (pg/mL)         |         |                     |                     |                     |
| Placebo               | 8.930   | 1.653<br>(0.519)    | 2.418<br>(0.418)    | 3.018<br>(0.808)    |
| Iberdomide 0.15 mg QD | 3.649   | 1.545<br>(0.586)    | 2.207<br>(0.574)    | 2.691<br>(1.077)    |
| Iberdomide 0.3 mg QD  | 11.487  | 1.496<br>(0.538)    | 1.954<br>(0.465)    | 3.994<br>(1.099)    |
| Iberdomide 0.45 mg QD | 4.793   | 1.417<br>(0.553)    | 2.206<br>(0.420)    | 2.456<br>(0.779)    |
| BLyS (pg/mL)          |         |                     |                     |                     |
| Placebo               | 391.910 | 349.972<br>(27.884) | 257.891<br>(28.241) | 240.733<br>(28.804) |
| Iberdomide 0.15 mg QD | 366.604 | 233.758<br>(36.399) | 258.327<br>(36.882) | 194.094<br>(31.097) |
| Iberdomide 0.3 mg QD  | 330.969 | 262.041<br>(27.318) | 258.493<br>(30.421) | 192.539<br>(24.621) |
| Iberdomide 0.45 mg QD | 423.164 | 282.603<br>(26.910) | 271.577<br>(27.586) | 220.855<br>(24.755) |

BLyS, B lymphocyte stimulator; IL, interleukin; SE, standard error.

**Supplementary Table 4.** Numeric data for Figure 3: Change from baseline in whole blood gene expression during iberdomide treatment

| <b>Adjusted mean (SE)</b> | <b>Week 0</b> | <b>Week 4</b>    | <b>Week 12</b>   | <b>Week 24</b>   |
|---------------------------|---------------|------------------|------------------|------------------|
| <b>B cell module</b>      |               |                  |                  |                  |
| Placebo                   | 1.183         | 1.077<br>(0.042) | 1.087<br>(0.051) | 1.079<br>(0.052) |
| Iberdomide 0.15 mg QD     | 1.274         | 0.973<br>(0.058) | 0.974<br>(0.064) | 0.882<br>(0.066) |
| Iberdomide 0.3 mg QD      | 1.280         | 0.887<br>(0.043) | 0.770<br>(0.050) | 0.693<br>(0.049) |
| Iberdomide 0.45 mg QD     | 1.389         | 0.702<br>(0.042) | 0.581<br>(0.048) | 0.496<br>(0.048) |
| <b>Type 1 IFN module</b>  |               |                  |                  |                  |
| Placebo                   | 1.124         | 0.997<br>(0.055) | 1.126<br>(0.069) | 1.123<br>(0.081) |
| Iberdomide 0.15 mg QD     | 1.273         | 0.492<br>(0.078) | 0.448<br>(0.095) | 0.434<br>(0.095) |
| Iberdomide 0.3 mg QD      | 1.258         | 0.507<br>(0.060) | 0.447<br>(0.075) | 0.449<br>(0.087) |
| Iberdomide 0.45 mg QD     | 1.191         | 0.482<br>(0.055) | 0.402<br>(0.070) | 0.392<br>(0.070) |
| <b>Ikaros</b>             |               |                  |                  |                  |
| Placebo                   | 0.820         | 0.784<br>(0.030) | 0.795<br>(0.033) | 0.786<br>(0.033) |
| Iberdomide 0.15 mg QD     | 0.786         | 0.973<br>(0.042) | 0.916<br>(0.045) | 0.901<br>(0.042) |
| Iberdomide 0.3 mg QD      | 0.798         | 1.000<br>(0.032) | 1.069<br>(0.036) | 1.008<br>(0.034) |
| Iberdomide 0.45 mg QD     | 0.845         | 0.980<br>(0.030) | 1.069<br>(0.033) | 1.035<br>(0.033) |

|                          |       |                  |                  |                  |
|--------------------------|-------|------------------|------------------|------------------|
| T cell exhaustion module |       |                  |                  |                  |
| Placebo                  | 0.739 | 0.691<br>(0.015) | 0.705<br>(0.015) | 0.712<br>(0.017) |
| Iberdomide 0.15 mg QD    | 0.741 | 0.691<br>(0.020) | 0.674<br>(0.021) | 0.677<br>(0.021) |
| Iberdomide 0.3 mg QD     | 0.710 | 0.699<br>(0.015) | 0.687<br>(0.016) | 0.693<br>(0.018) |
| Iberdomide 0.45 mg QD    | 0.693 | 0.724<br>(0.015) | 0.699<br>(0.016) | 0.709<br>(0.017) |
| Ikaros Type 1 INF module |       |                  |                  |                  |
| Placebo                  | 1.118 | 1.054<br>(0.055) | 1.087<br>(0.058) | 1.118<br>(0.067) |
| Iberdomide 0.15 mg QD    | 1.160 | 0.560<br>(0.076) | 0.457<br>(0.079) | 0.519<br>(0.082) |
| Iberdomide 0.3 mg QD     | 1.084 | 0.587<br>(0.056) | 0.516<br>(0.061) | 0.505<br>(0.069) |
| Iberdomide 0.45 mg QD    | 1.226 | 0.487<br>(0.055) | 0.396<br>(0.057) | 0.376<br>(0.060) |
| Aiolos                   |       |                  |                  |                  |
| Placebo                  | 0.635 | 0.659<br>(0.028) | 0.632<br>(0.029) | 0.562<br>(0.029) |
| Iberdomide 0.15 mg QD    | 0.637 | 0.696<br>(0.039) | 0.747<br>(0.039) | 0.697<br>(0.040) |
| Iberdomide 0.3 mg QD     | 0.704 | 0.735<br>(0.029) | 0.760<br>(0.031) | 0.703<br>(0.033) |
| Iberdomide 0.45 mg QD    | 0.692 | 0.688<br>(0.028) | 0.744<br>(0.030) | 0.716<br>(0.030) |

INF, interferon; SE, standard error.

**Supplementary Table 5.** Numeric data for Figure 5: Clinical efficacy treatment comparison (Week 24 SRI-4 response rate, iberdomide 0.45 mg – placebo) within prespecified patient subsets defined by gene expression at baseline

| <b>Stratified Difference, %,</b> |                         |               |
|----------------------------------|-------------------------|---------------|
| <b>Patient subset</b>            | <b>SRI-4 at Week 24</b> | <b>95% CI</b> |
| Overall                          | 19.4                    | 4.12, 33.42   |
| Aiolos high                      | 32.9                    | 7.74, 52.90   |
| Type 1 IFN high                  | 26.8                    | 7.49, 43.54   |
| Ikaros IFN high                  | 24.3                    | 5.45, 40.76   |
| T cell exhaustion low            | 21.9                    | 4.30, 37.77   |
| B cell high                      | 20.4                    | 0.74, 38.01   |
| Ikaros low                       | 21.5                    | -9.16, 48.45  |
| B cell low                       | 17.1                    | -7.45, 39.64  |
| Ikaros high                      | 16.1                    | -1.76, 32.65  |
| Aiolos low                       | 9.0                     | -10.11, 27.50 |
| Ikaros IFN low                   | 8.3                     | -17.65, 34.68 |
| Type 1 IFN low                   | 7.0                     | -18.01, 32.11 |
| T cell exhaustion high           | 4.1                     | -24.69, 33.88 |

CI, confidence interval; IFN, interferon; SLE, systemic lupus erythematosus; SRI, SLE responder index.

**Supplementary Figure 1.** Population-predicted exposure by dose in A) all patients, B) patients by type I IFN signature at baseline and C) patients by Aiolos expression at baseline. The horizontal bold line in each boxplot represents the median value. The top and bottom edges of the box represent the 25th and 75th percentiles, respectively. Whiskers represent  $1.5 \times$  interquartile range. Dots are outliers.  $AUC_{ss}$ , area under concentration-time curve at steady state.

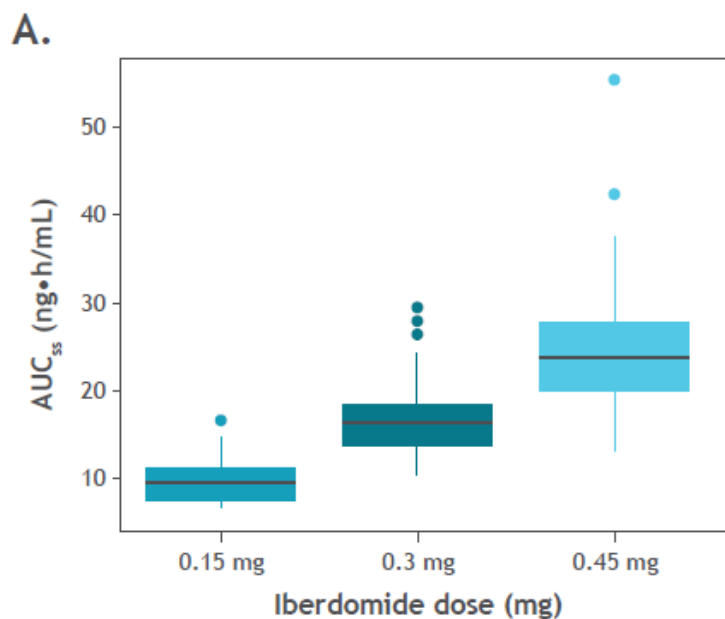

**B.**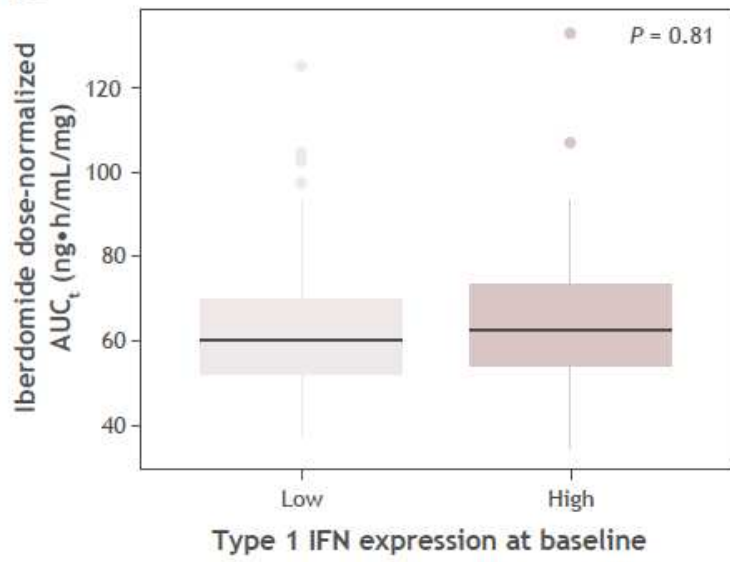**C.**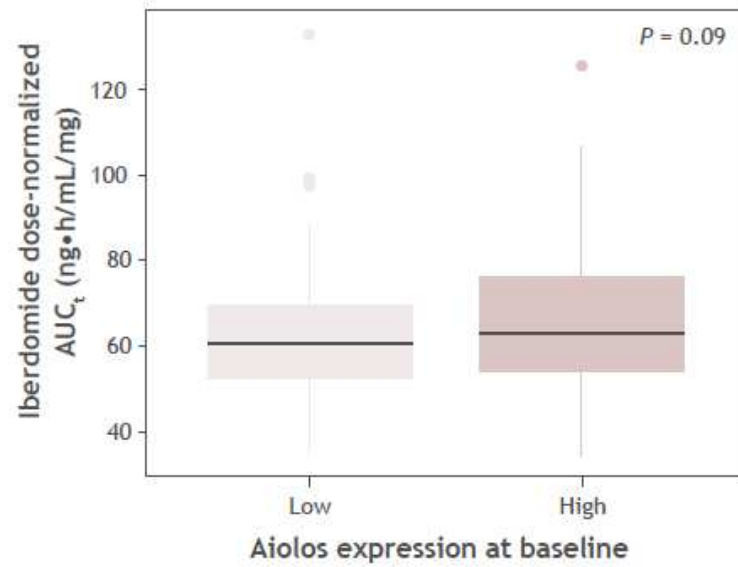



**Supplementary Figure 2.** Biomarker baseline and percent change from baseline values in IFN-Low (type I IFN genes  $\leq -1.38$ ) and IFN-High (type I IFN genes  $> -1.38$ ) subsets for type I IFN signature score [*IFI27*, *IFI44*, *IFI44L*, *RSAD2*], CD303+ plasmacytoid dendritic cells, CD19+ B cells, interleukin-2, regulatory T cells, and double-stranded DNA antibodies (in patients with baseline dsDNA Abs  $\geq 8$  IU/mL). \* $p \leq 0.05$ , \*\* $p \leq 0.01$ , \*\*\* $p \leq 0.001$ .

From N Engl J Med, Merrill JT, Werth VP, Furie R, van Vollenhoven R, Dörner T, Petronijevic M, et al, Phase 2 trial of iberdomide in systemic lupus erythematosus, Volume No. 386, 1034-1045. Copyright © 2022 Massachusetts Medical Society. Reprinted with permission.

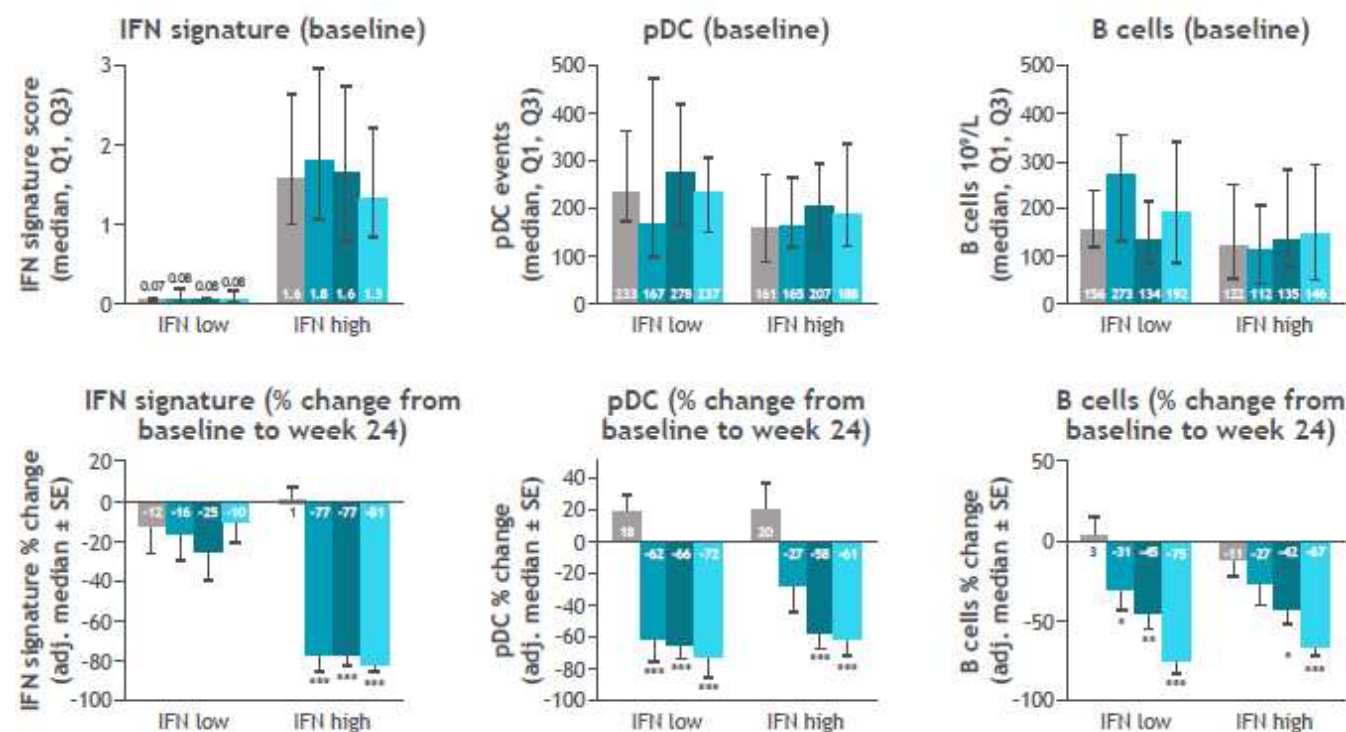

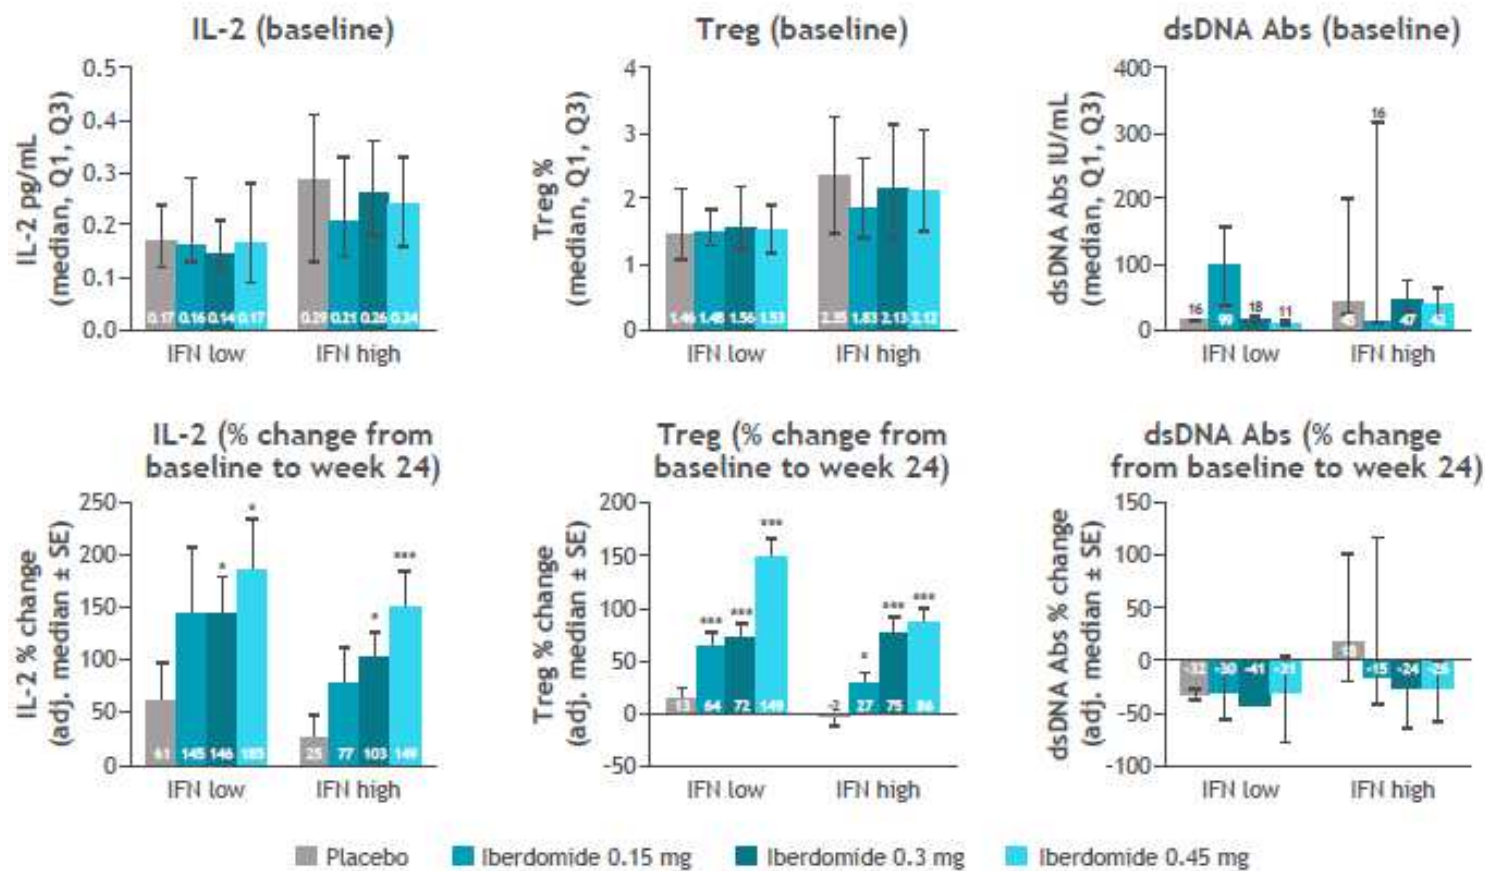

**Supplementary Figure 3.** Biomarker baseline and percent change from baseline values in Aiolos-Low ( $IKZF3 \leq -0.49$ ) and Aiolos-High ( $IKZF3 > -0.49$ ) subsets: IFN signature score, CD303+ plasmacytoid dendritic cells, CD19+ B cells, interleukin-2, regulatory T cells, and double-stranded DNA antibodies (in patients with baseline dsDNA Abs  $\geq 8$  IU/mL). \* $p < 0.05$ , \*\* $p < 0.01$ , \*\*\* $p < 0.001$ .

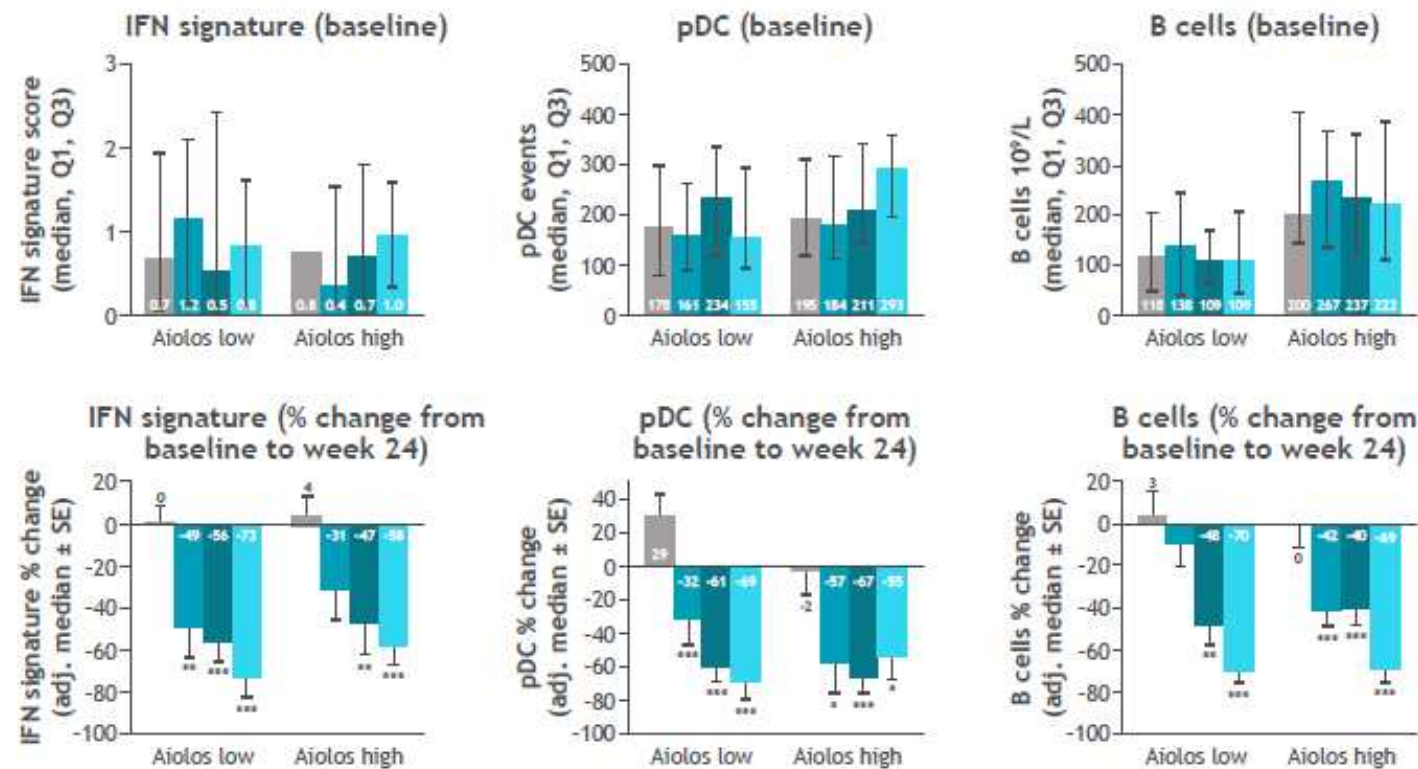

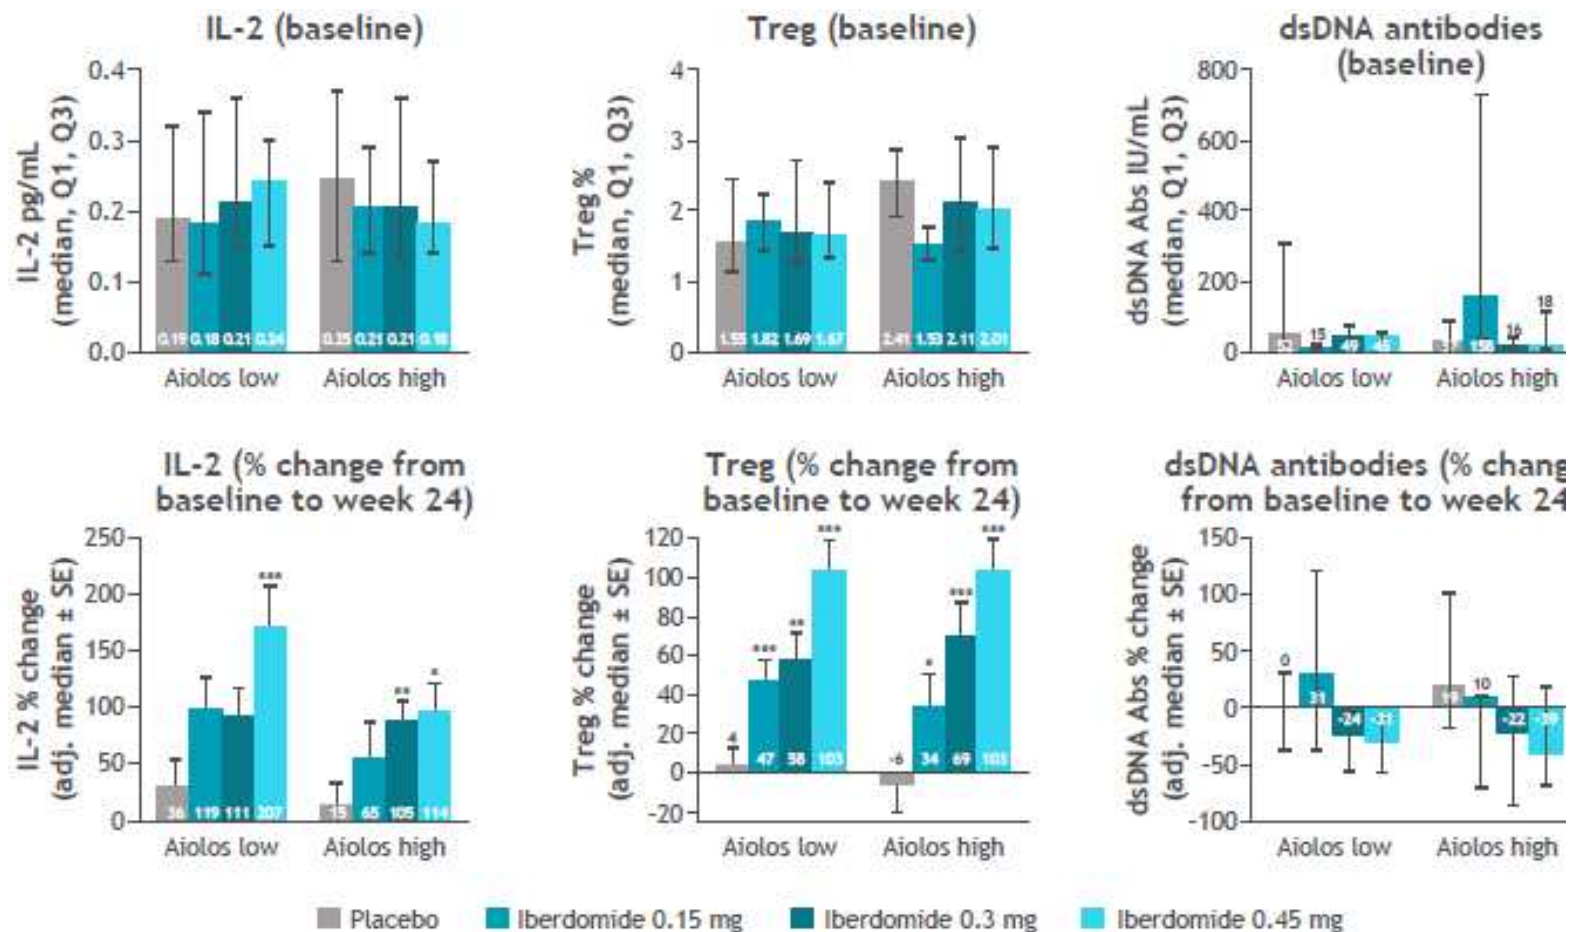

Supplement: annrheumdis-2022-222212supp004.pdf [file annrheumdis-2022-222212supp004.pdf]
